# Supplementary material for: Circulating MicroRNA: Incident Asthma Prediction and Vitamin D Effect Modification
Source: MDPI journal article supplement (doi:10.3390/jpm11040307), 2021-04-16

# Circulating MicroRNA: Incident Asthma Prediction and Vitamin D Effect Modification

Jiang Li<sup>1,2</sup>, Anshul Tiwari<sup>2</sup>, Hooman Mirzakhani<sup>2</sup>, Alberta L Wang<sup>2</sup>, Alvin T Kho<sup>2,3</sup>, Michael J McGeachie<sup>2</sup>, Augusto A. Litonjua<sup>4</sup>, Scott T Weiss<sup>2</sup>, Kelan G Tantisira<sup>2,5,\*</sup>

<sup>1</sup> Research Center, The Seventh Affiliated Hospital of Sun Yat-Sen University, Shenzhen, Guangdong 518107, China;

<sup>2</sup> Channing Division of Network Medicine, Brigham and Women's Hospital and Harvard Medical School, Boston, MA 02115, USA;

<sup>3</sup> Computational Health Informatics Program, Boston Children's Hospital, Boston, MA 02115, USA

<sup>4</sup> Division of Pediatric Pulmonary Medicine, Golisano Children's Hospital at Strong, University of Rochester Medical Center, Rochester, NY 14642, USA;

<sup>5</sup> Division of Pediatric Respiratory Medicine, University of California San Diego and Rady Children's Hospital, San Diego, CA 92123, USA;

\* Correspondence: [ktantisira@health.ucsd.edu](mailto:ktantisira@health.ucsd.edu); Tel.: +1-(858)-966-5846; Fax: +1-(858)-966-8457

## Supplemental Tables

**Table S1. Significant miRNAs in Main Analysis.**

| miRNA           | VDAART |               |             | Project Viva |               |             |
|-----------------|--------|---------------|-------------|--------------|---------------|-------------|
|                 | OR     | 95% CI for OR |             | OR           | 95% CI for OR |             |
|                 |        | Lower Bound   | Upper Bound |              | Lower Bound   | Upper Bound |
| hsa-miR-548k    | 0.398  | 0.205         | 0.772       | 0.667        | 0.212         | 2.099       |
| hsa-miR-6509-5p | 2.582  | 1.226         | 5.438       | ---          | ---           | ---         |
| hsa-miR-21-5p   | 0.27   | 0.096         | 0.764       | 1.561        | 0.362         | 6.723       |
| hsa-miR-30d-3p  | 0.461  | 0.236         | 0.898       | ---          | ---           | ---         |
| hsa-miR-195-5p  | 1.823  | 1.061         | 3.131       | ---          | ---           | ---         |
| hsa-miR-505-3p  | 2.502  | 1.088         | 5.755       | 0.961        | 0.375         | 2.461       |

**Table S2. Stratified analysis in Placebo Group.**

| miRNA           | OR   | 95% CI for OR |             |
|-----------------|------|---------------|-------------|
|                 |      | Lower Bound   | Upper Bound |
| hsa-miR-505-3p  | 7.83 | 1.78          | 34.34       |
| hsa-miR-193b-5p | 0.51 | 0.29          | 0.92        |
| hsa-miR-7-1-3p  | 0.26 | 0.07          | 0.90        |
| hsa-miR-340-3p  | 2.00 | 1.05          | 3.82        |
| hsa-miR-5010-5p | 0.45 | 0.21          | 0.97        |
| hsa-miR-548k    | 0.43 | 0.19          | 0.99        |

**Table S3. Validated significant miRNAs in Project Viva.**

| miRNA             | VDAART |             |             |             |             |             | Project Viva |             |             |             |             |             |
|-------------------|--------|-------------|-------------|-------------|-------------|-------------|--------------|-------------|-------------|-------------|-------------|-------------|
|                   | High   |             |             | Interaction |             |             | High         |             |             | Interaction |             |             |
|                   | OR     | Lower Bound | Upper Bound | OR          | Lower Bound | Upper Bound | OR           | Lower Bound | Upper Bound | OR          | Lower Bound | Upper Bound |
| hsa-miR-574-5p    | 7.20   | 1.16        | 44.78       | 19.20       | 2.38        | 155.11      | 27.59        | 0.19        | 3995.22     | 3.90        | 0.15        | 103.06      |
| hsa-miR-151a-5p   | 0.15   | 0.02        | 0.86        | 0.05        | 0.01        | 0.42        | 0.34         | 0.02        | 4.77        | 0.37        | 0.01        | 12.54       |
| hsa-miR-125b-2-3p | 5.46   | 1.38        | 21.52       | 8.62        | 1.77        | 41.84       | 2.90         | 0.19        | 44.37       | 35.01       | 0.12        | 10403.99    |
| hsa-miR-6852-5p   | 0.19   | 0.05        | 0.79        | 0.12        | 0.03        | 0.58        | 0.21         | 0.02        | 1.75        | 0.32        | 0.03        | 3.59        |
| hsa-miR-342-3p    | 3.72   | 1.31        | 10.62       | 5.83        | 1.63        | 20.89       | 2.71         | 0.51        | 14.38       | 3.38        | 0.10        | 114.40      |
| hsa-miR-370-3p    | 0.33   | 0.13        | 0.83        | 0.33        | 0.12        | 0.94        | 0.51         | 0.18        | 1.44        | 0.86        | 0.12        | 6.21        |
| hsa-miR-193b-5p   | 2.85   | 1.23        | 6.60        | 5.55        | 1.99        | 15.45       | 1.82         | 0.51        | 6.49        | 3.10        | 0.43        | 22.47       |
| hsa-miR-122-5p    | 2.68   | 1.21        | 5.96        | 3.05        | 1.20        | 7.74        | 1.75         | 0.60        | 5.10        | 3.60        | 0.70        | 18.54       |
| hsa-miR-215-5p    | 2.62   | 1.11        | 6.17        | 3.05        | 1.14        | 8.13        | 4.67         | 0.63        | 34.38       | 38.44       | 0.36        | 4150.60     |

**Table S4. KEGG Enrichment Analysis of Target Genes of Validated miRNAs.**

| Name                                                       | Hits | P Value  | FDR      |
|------------------------------------------------------------|------|----------|----------|
| Chronic myeloid leukemia                                   | 30   | 4.41E-09 | 4.41E-07 |
| Pathways in cancer                                         | 78   | 1.04E-08 | 4.80E-07 |
| Cell cycle                                                 | 41   | 1.44E-08 | 4.80E-07 |
| Colorectal cancer                                          | 22   | 7.91E-08 | 1.98E-06 |
| Pancreatic cancer                                          | 25   | 1.52E-06 | 3.04E-05 |
| TGF-beta signaling pathway                                 | 28   | 2.47E-06 | 4.12E-05 |
| Prostate cancer                                            | 28   | 5.39E-06 | 7.70E-05 |
| HTLV-I infection                                           | 49   | 1.31E-05 | 1.64E-04 |
| ErbB signaling pathway                                     | 27   | 1.69E-05 | 1.88E-04 |
| Glioma                                                     | 21   | 7.60E-05 | 7.60E-04 |
| Wnt signaling pathway                                      | 36   | 1.35E-04 | 1.23E-03 |
| Melanoma                                                   | 21   | 1.58E-04 | 1.32E-03 |
| Bladder cancer                                             | 12   | 2.00E-04 | 1.45E-03 |
| Jak-STAT signaling pathway                                 | 27   | 2.03E-04 | 1.45E-03 |
| Small cell lung cancer                                     | 23   | 2.57E-04 | 1.71E-03 |
| Focal adhesion                                             | 45   | 2.93E-04 | 1.83E-03 |
| Neurotrophin signaling pathway                             | 30   | 7.53E-04 | 4.28E-03 |
| Epstein-Barr virus infection                               | 24   | 7.71E-04 | 4.28E-03 |
| Osteoclast differentiation                                 | 29   | 9.31E-04 | 4.90E-03 |
| Non-small cell lung cancer                                 | 16   | 9.85E-04 | 4.90E-03 |
| Regulation of actin cytoskeleton                           | 40   | 1.03E-03 | 4.90E-03 |
| p53 signaling pathway                                      | 19   | 1.27E-03 | 5.77E-03 |
| Renal cell carcinoma                                       | 17   | 1.91E-03 | 8.30E-03 |
| Epithelial cell signaling in Helicobacter pylori infection | 12   | 2.54E-03 | 1.06E-02 |
| Sphingolipid metabolism                                    | 13   | 6.49E-03 | 2.60E-02 |
| Acute myeloid leukemia                                     | 15   | 7.38E-03 | 2.74E-02 |
| Pyrimidine metabolism                                      | 23   | 7.45E-03 | 2.74E-02 |
| Pertussis                                                  | 14   | 7.68E-03 | 2.74E-02 |
| Insulin signaling pathway                                  | 29   | 8.49E-03 | 2.93E-02 |
| Thyroid cancer                                             | 9    | 9.21E-03 | 3.07E-02 |
| Herpes simplex infection                                   | 23   | 9.51E-03 | 3.07E-02 |
| T cell receptor signaling pathway                          | 22   | 1.04E-02 | 3.18E-02 |
| Adherens junction                                          | 17   | 1.05E-02 | 3.18E-02 |
| Endometrial cancer                                         | 12   | 1.18E-02 | 3.47E-02 |
| Protein processing in endoplasmic reticulum                | 27   | 1.26E-02 | 3.60E-02 |
| Apoptosis                                                  | 19   | 1.35E-02 | 3.75E-02 |
| Chagas disease (American trypanosomiasis)                  | 20   | 1.40E-02 | 3.78E-02 |
| Measles                                                    | 22   | 1.65E-02 | 4.34E-02 |
| Toll-like receptor signaling pathway                       | 21   | 1.81E-02 | 4.55E-02 |
| Viral myocarditis                                          | 8    | 1.82E-02 | 4.55E-02 |
| MAPK signaling pathway                                     | 48   | 1.92E-02 | 4.68E-02 |
| Fc epsilon RI signaling pathway                            | 17   | 2.07E-02 | 4.93E-02 |

## Supplemental Figures

Figure S1. Boxplot of normalized miRNA counts of hsa-miR-574-5p and hsa-miR-151a-5p. (A) Boxplot of hsa-miR-574-5p in high vitamin D treatment group. B) Boxplot of hsa-miR-151a-5p in high vitamin D treatment group.

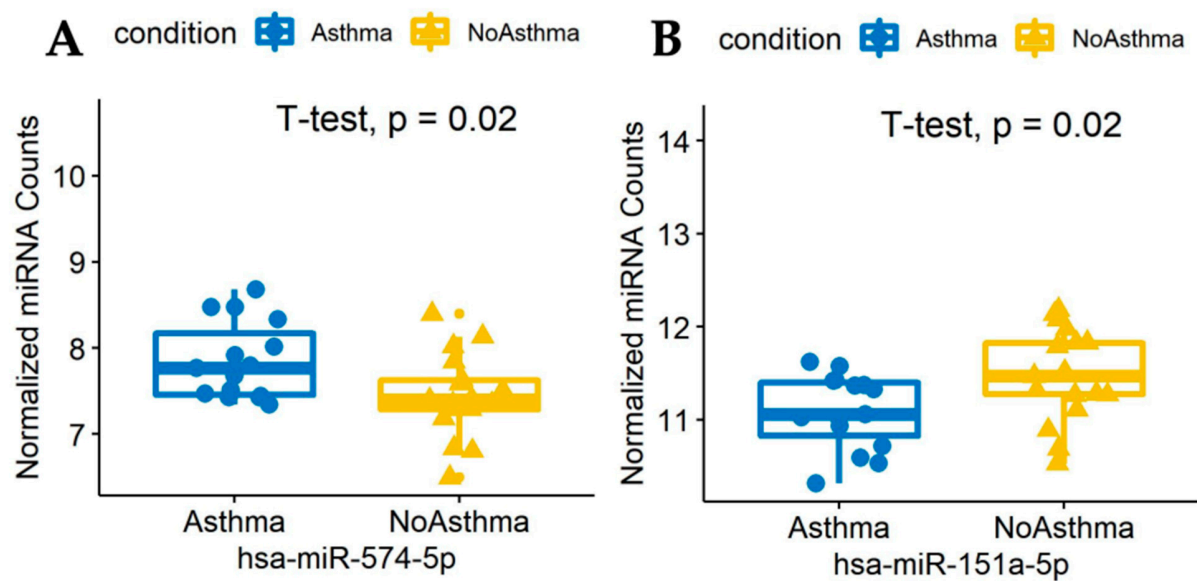

Figure S2. Meta-analysis of the effect modification for 9 validated miRNAs.

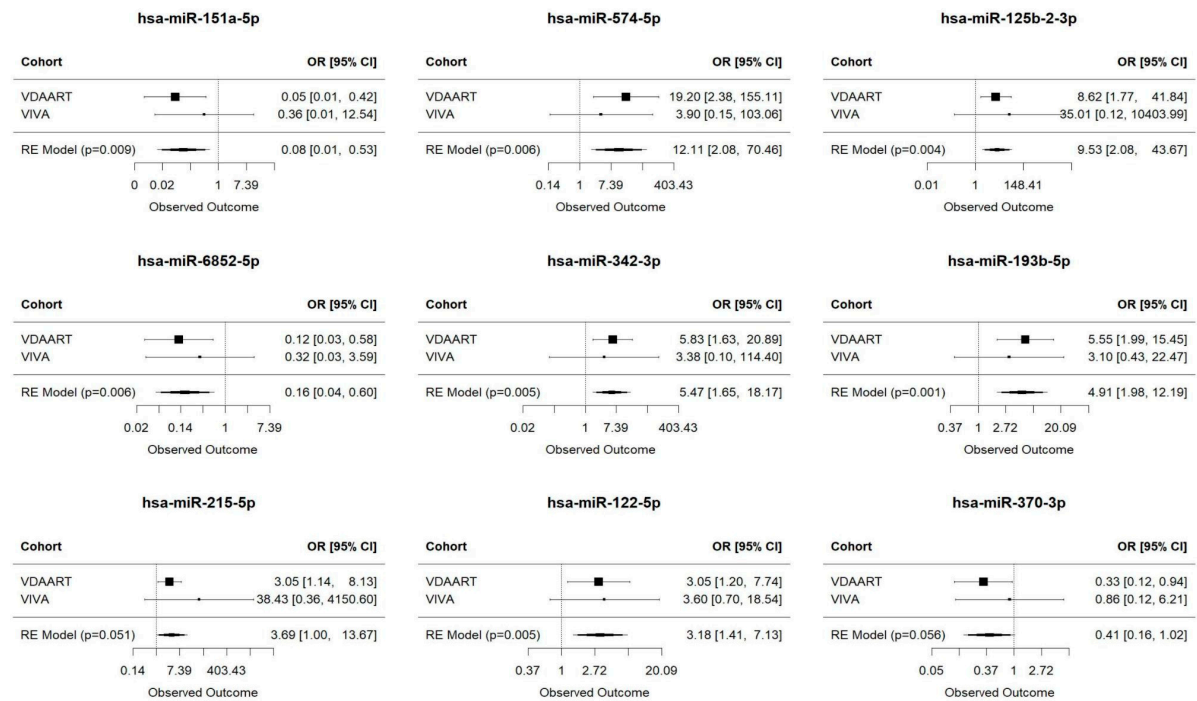

Supplement: s1 [file s1]
